# Supplementary material for: Admission Random Blood Glucose, Fasting Blood Glucose, Stress Hyperglycemia Ratio, and Functional Outcomes in Patients With Acute Ischemic Stroke Treated With Intravenous Thrombolysis
Source: PubMed Central journal article supplement (PMC8861349; doi:10.3389/fnagi.2022.782282), 2022-02-08
Supplement: Data_Sheet_1.pdf [file Data_Sheet_1.pdf]

**Table S1.** Patient characteristics dichotomized according to stress hyperglycemia ratio.

| Characteristics            | RBG to HbA1c ratio (SHR1) |                 |                | FBG to HbA1c ratio (SHR2) |                 |                |
|----------------------------|---------------------------|-----------------|----------------|---------------------------|-----------------|----------------|
|                            | ≤ 1.35 (n = 168)          | > 1.35 (n = 62) | <i>p</i> value | ≤ 0.92 (n = 137)          | > 0.92 (n = 93) | <i>p</i> value |
| <b>Demographic data</b>    |                           |                 |                |                           |                 |                |
| Age, (years)               | 67.80 ± 12.24             | 69.45 ± 12.93   | 0.375          | 67.44 ± 11.98             | 69.44 ± 13.02   | 0.233          |
| Sex, (male, n.%)           | 104 (61.90)               | 39 (62.90)      | 0.890          | 90 (65.69)                | 53 (56.99)      | 0.182          |
| BMI, (kg/m <sup>2</sup> )  | 23.10 ± 3.32              | 23.39 ± 3.56    | 0.572          | 22.99 ± 3.23              | 23.46 ± 3.59    | 0.297          |
| <b>Stroke risk factors</b> |                           |                 |                |                           |                 |                |
| Current smoking, n (%)     | 44 (26.19)                | 12 (19.35)      | 0.284          | 40 (29.20)                | 16 (17.20)      | 0.038          |
| Hypertension, n (%)        | 98 (58.33)                | 42 (67.74)      | 0.195          | 76 (55.47)                | 64 (68.82)      | 0.042          |
| Diabetes, n (%)            | 42 (25.00)                | 34 (54.84)      | < 0.001        | 33 (24.09)                | 43 (46.24)      | < 0.001        |
| Hyperlipidemia, n (%)      | 13 (7.74)                 | 12 (19.35)      | 0.012          | 10 (7.30)                 | 15 (16.13)      | 0.035          |
| Atrial fibrillation, n (%) | 34 (20.24)                | 18 (29.03)      | 0.157          | 26 (18.98)                | 26 (27.96)      | 0.110          |
| Prior stroke, n (%)        | 22 (13.10)                | 7 (11.29)       | 0.714          | 18 (13.14)                | 11 (11.83)      | 0.769          |
| <b>Laboratory data</b>     |                           |                 |                |                           |                 |                |
| Hemoglobin (g/L)           | 133.61 ± 14.77            | 132.98 ± 14.11  | 0.772          | 133.39 ± 13.69            | 133.52 ± 15.84  | 0.950          |
| Creatinine (umol/L)        | 70.36 ± 15.91             | 71.26 ± 18.72   | 0.717          | 70.73 ± 17.69             | 70.41 ± 15.16   | 0.886          |
| TC, (mmol/L)               | 4.68 ± 1.02               | 4.74 ± 1.12     | 0.692          | 4.59 ± 1.05               | 4.84 ± 1.02     | 0.068          |
| TG, (mmol/L)               | 1.42 ± 1.13               | 1.71 ± 1.42     | 0.098          | 1.37 ± 0.76               | 1.66 ± 1.67     | 0.124          |
| HDL, (mmol/L)              | 1.13 ± 0.26               | 1.11 ± 0.30     | 0.621          | 1.11 ± 0.27               | 1.14 ± 0.27     | 0.384          |
| LDL, (mmol/L)              | 2.98 ± 0.89               | 2.94 ± 1.00     | 0.779          | 2.91 ± 0.93               | 3.06 ± 0.90     | 0.240          |
| HbA1c (%)                  | 6.28 ± 0.92               | 7.16 ± 2.00     | < 0.001        | 6.27 ± 1.04               | 6.88 ± 1.65     | 0.002          |
| RBG, (mmol/L)              | 6.71 ± 1.47               | 12.12 ± 4.31    | < 0.001        | 7.25 ± 2.69               | 9.52 ± 4.11     | < 0.001        |
| FBG, (mmol/L)              | 5.67 ± 1.93               | 7.54 ± 3.12     | < 0.001        | 5.01 ± 1.06               | 7.89 ± 2.88     | < 0.001        |
| TyG                        | 8.57 ± 0.60               | 8.97 ± 0.78     | 0.001          | 8.48 ± 0.53               | 8.98 ± 0.75     | < 0.001        |
| <b>Clinical data</b>       |                           |                 |                |                           |                 |                |
| SBP, (mmHg)                | 161.24 ± 24.28            | 160.52 ± 24.85  | 0.841          | 157.20 ± 23.27            | 166.71 ± 25.00  | 0.004          |
| DBP, (mmHg)                | 89.77 ± 14.77             | 89.21 ± 16.25   | 0.803          | 87.62 ± 14.74             | 92.57 ± 15.33   | 0.015          |
| DNT, (minute)              | 55 (45-74)                | 60 (45-77)      | 0.296          | 54 (44-73)                | 60 (49-84)      | 0.048          |
| ONT, (minute)              | 155 (126-204)             | 169 (130-192)   | 0.755          | 153 (126-200)             | 165 (169-202)   | 0.861          |
| NIHSS at admission         | 7 (4-11)                  | 8 (5-14)        | 0.074          | 6 (4-10)                  | 9 (6-16)        | < 0.001        |
| NIHSS at 24h               | 4 (2-9)                   | 6 (3-11)        | 0.137          | 4 (2-7)                   | 9 (4-14)        | < 0.001        |
| Stroke subtype, n (%)      |                           |                 | 0.338          |                           |                 | 0.567          |
| CE                         | 66 (39.29)                | 20 (32.26)      |                | 48 (35.04)                | 38 (40.86)      |                |
| LAA                        | 65 (38.69)                | 22 (35.49)      |                | 51 (37.23)                | 36 (38.71)      |                |
| SAO                        | 20 (11.90)                | 13 (20.97)      |                | 23 (16.79)                | 10 (10.76)      |                |
| SOE/SUE                    | 17 (10.12)                | 7 (11.29)       |                | 15 (10.95)                | 9 (9.68)        |                |

Abbreviations: BMI body mass index, TC total cholesterol, TG triglyceride, LDL low-density lipoprotein, HDL high-density lipoprotein, RBG random blood glucose, FBG fasting blood glucose, TyG triglyceride-glucose index, SHR Stress hyperglycemia ratio, SBP systolic blood pressure, DBP diastolic blood pressure, DNT Door to needle time, ONT Onset to needle time, NIHSS National Institute of Health Stroke Scale, LAA largeartery atherosclerosis, CE cardioembolism, SAO small-artery occlusion, SOE stroke of other determined etiology, SUE stroke of undetermined etiology,

**Table S2.** Univariate and multivariate logistic regression analysis for 3-month poor function outcomes using another definition of stress hyperglycemia ratio.

| Variables                     | Crude Model          |                | Model 1              |                | Model 2              |                | Model 3              |                |
|-------------------------------|----------------------|----------------|----------------------|----------------|----------------------|----------------|----------------------|----------------|
|                               | OR ( 95% CI )        | <i>p</i> value | OR ( 95% CI )        | <i>p</i> value | OR ( 95% CI )        | <i>p</i> value | OR ( 95% CI )        | <i>p</i> value |
| SHR1 Q1 (< 0.86)              | Ref.                 |                | Ref.                 |                | Ref.                 |                | Ref.                 |                |
| SHR1 Q2 (0.86-0.97)           | 0.919 (0.397-2.124)  | 0.843          | 0.792 (0.302-1.965)  | 0.616          | 1.427 (0.470-4.328)  | 0.530          | 1.487 (0.486-4.546)  | 0.487          |
| SHR1 Q3 (0.97-1.20)           | 0.992 (0.445-2.211)  | 0.984          | 0.838 (0.357-1.967)  | 0.685          | 1.526 (0.512-4.555)  | 0.448          | 1.512 (0.525-4.707)  | 0.419          |
| SHR1 Q4 (> 1.20)              | 2.117 (0.970-4.620)  | 0.060          | 1.888 (0.612-4.393)  | 0.140          | 2.656 (0.937-7.533)  | 0.066          | 2.721 (0.932-7.946)  | 0.067          |
| SHR1 (per 0.1-point increase) | 1.099 (0.986-1.225)  | 0.089          | 1.089 (0.969-1.224)  | 0.153          | 1.122 (0.981-1.285)  | 0.094          | 1.125 (0.978-1.295)  | 0.099          |
| SHR2 Q1 (< 0.66)              | Ref.                 |                | Ref.                 |                | Ref.                 |                | Ref.                 |                |
| SHR2 Q2 (0.66-0.75)           | 0.958 (0.332-2.767)  | 0.937          | 0.877 (0.289-2.657)  | 0.816          | 1.081 (0.302-3.865)  | 0.905          | 1.105 (0.307-3.391)  | 0.879          |
| SHR2 Q3 (0.75-0.88)           | 3.833 (1.559-9.428)  | 0.003          | 4.085 (1.563-10.681) | 0.004          | 4.570 (1.515-13.786) | 0.007          | 4.643 (1.526-14.125) | 0.007          |
| SHR2 Q4 (> 0.88)              | 6.900 (2.751-15.305) | < 0.001        | 7.149 (2.654-19.258) | < 0.001        | 6.769 (2.142-21.387) | 0.001          | 7.419 (2.122-25.935) | 0.002          |
| SHR2 (per 0.1-point increase) | 1.539 (1.280-1.849)  | < 0.001        | 1.636 (1.326-2.020)  | < 0.001        | 1.554 (1.222-1.974)  | < 0.001        | 1.636 (1.250-2.140)  | < 0.001        |

Abbreviations: SHR Stress hyperglycemia ratio, SHR1 was defined as  $[\text{RBG (mmol/L)}]/[(1.59 \cdot \text{HbA1c}) - 2.59]$  and SHR2 was defined as  $[\text{FBG (mmol/L)}]/[(1.59 \cdot \text{HbA1c}) - 2.59]$ .

Model 1 adjusted for age and sex.

Model 2 adjusted for age, sex, current smoking, hyperlipidemia, atrial fibrillation, prior stroke, systolic blood pressure (SBP) and NIHSS at admission.

Model 3 adjusted for covariates from Model 2 and further adjusted for body mass index (BMI), diabetes and triglyceride-glucose index (TyG).

**Table S3.** Univariate and multivariate logistic regression analysis for 3-month mortality.

| Variables                     | Crude Model            |                | Model 1                |                | Model 2              |                | Model 3                |                |
|-------------------------------|------------------------|----------------|------------------------|----------------|----------------------|----------------|------------------------|----------------|
|                               | OR ( 95% CI )          | <i>p</i> value | OR ( 95% CI )          | <i>p</i> value | OR ( 95% CI )        | <i>p</i> value | OR ( 95% CI )          | <i>p</i> value |
| SHR1 Q1 (< 1.02)              | Ref.                   |                | Ref.                   |                | Ref.                 |                | Ref.                   |                |
| SHR1 Q2 (1.02-1.15)           | 2.100 (0.479-9.213)    | 0.325          | 1.027 (0.202-5.224)    | 0.974          | 2.427 (0.306-19.271) | 0.402          | 2.577 (0.301-22.086)   | 0.388          |
| SHR1 Q3 (1.15-1.44)           | 3.062 (0.752-12.456)   | 0.118          | 2.202 (0.506-9.579)    | 0.293          | 6.136 (0.774-48.621) | 0.086          | 7.446 (0.854-64.943)   | 0.069          |
| SHR1 Q4 (> 1.44)              | 4.773 (1.242-18.345)   | 0.023          | 3.258 (0.775-13.693)   | 0.107          | 6.177 (0.869-43.924) | 0.069          | 8.210 (1.007-66.972)   | 0.049          |
| SHR1 (> 1.35 versus ≤ 1.35)   | 2.373 (1.013-5.555)    | 0.047          | 2.165 (0.843-5.561)    | 0.109          | 2.282 (0.683-7.622)  | 0.180          | 2.443 (0.650-9.186)    | 0.186          |
| SHR1 (per 0.1-point increase) | 1.129 (1.005-1.269)    | 0.041          | 1.115 (0.976-1.274)    | 0.110          | 1.141 (0.960-1.356)  | 0.135          | 1.174 (0.960-1.437)    | 0.118          |
| SHR2 Q1 (< 0.79)              | Ref.                   |                | Ref.                   |                | Ref.                 |                | Ref.                   |                |
| SHR2 Q2 (0.79-0.89)           | 4.604 (0.499-42.473)   | 0.178          | 3.051 (0.311-29.904)   | 0.338          | 1.894 (0.163-21.969) | 0.610          | 2.109 (0.173-25.694)   | 0.559          |
| SHR2 Q3 (0.89-1.03)           | 9.957 (1.204-82.353)   | 0.033          | 7.035 (0.821-62.020)   | 0.075          | 4.187 (0.423-41.439) | 0.221          | 5.153 (0.491-54.083)   | 0.172          |
| SHR2 Q4 (> 1.03)              | 17.429 (2.183-139.159) | 0.007          | 13.802 (1.645-115.779) | 0.016          | 7.714 (0.794-74.903) | 0.078          | 11.528 (1.027-129.453) | 0.048          |
| SHR2 (> 0.92 versus ≤ 0.92)   | 5.506 (2.144-14.657)   | < 0.001        | 4.891 (1.753-13.647)   | 0.002          | 3.132 (0.908-10.809) | 0.071          | 3.592 (0.950-13.578)   | 0.059          |
| SHR2 (per 0.1-point increase) | 1.321 (1.129-1.547)    | 0.001          | 1.326 (1.112-1.582)    | 0.002          | 1.229 (0.995-1.517)  | 0.056          | 1.448 (1.073-1.953)    | 0.016          |

Abbreviations: SHR Stress hyperglycemia ratio, SHR1 was defined as [RBG (mmol/L)]/[HbA1c (%)] and SHR2 was defined as [FBG (mmol/L)]/[HbA1c(%)].

Model 1 adjusted for age and sex.

Model 2 adjusted for age, sex, current smoking, hyperlipidemia, atrial fibrillation, prior stroke, systolic blood pressure (SBP) and NIHSS at admission.

Model 3 adjusted for covariates from Model 2 and further adjusted for body mass index (BMI), diabetes and triglyceride-glucose index (TyG).

**Table S4.** Univariate and multivariate logistic regression analysis for early neurological improvement (ENI).

| Variables                     | Crude Model         |                | Model 1             |                | Model 2             |                | Model 3             |                |
|-------------------------------|---------------------|----------------|---------------------|----------------|---------------------|----------------|---------------------|----------------|
|                               | OR ( 95% CI )       | <i>p</i> value | OR ( 95% CI )       | <i>p</i> value | OR ( 95% CI )       | <i>p</i> value | OR ( 95% CI )       | <i>p</i> value |
| SHR1 Q1 (< 1.02)              | Ref.                |                | Ref.                |                | Ref.                |                | Ref.                |                |
| SHR1 Q2 (1.02-1.15)           | 0.600 (0.276-1.303) | 0.197          | 0.607 (0.278-1.328) | 0.212          | 0.639 (0.304-1.561) | 0.372          | 0.662 (0.287-1.525) | 0.332          |
| SHR1 Q3 (1.15-1.44)           | 1.379 (0.663-2.868) | 0.389          | 1.389 (0.666-2.895) | 0.381          | 1.537 (0.715-3.281) | 0.273          | 1.522 (0.701-3.307) | 0.288          |
| SHR1 Q4 (> 1.44)              | 0.735 (0.343-1.574) | 0.428          | 0.739 (0.345-1.534) | 0.436          | 0.718 (0.325-1.588) | 0.413          | 0.756 (0.329-1.739) | 0.511          |
| SHR1 (> 1.35 versus ≤ 1.35)   | 0.972 (0.528-1.787) | 0.926          | 0.972 (0.528-1.790) | 0.928          | 0.909 (0.481-1.717) | 0.768          | 0.914 (0.488-1.906) | 0.964          |
| SHR1 (per 0.1-point increase) | 0.981 (0.900-1.068) | 0.654          | 0.981 (0.900-1.069) | 0.657          | 0.979 (0.897-1.069) | 0.640          | 0.986 (0.895-1.085) | 0.766          |
| SHR2 Q1 (< 0.79)              | Ref.                |                | Ref.                |                | Ref.                |                | Ref.                |                |
| SHR2 Q2 (0.79-0.89)           | 0.560 (0.265-1.186) | 0.130          | 0.563 (0.265-1.198) | 0.119          | 0.575 (0.165-1.248) | 0.161          | 0.576 (0.264-1.255) | 0.165          |
| SHR2 Q3 (0.89-1.03)           | 0.575 (0.271-1.219) | 0.149          | 0.579 (0.271-1.237) | 0.141          | 0.557 (0.150-1.243) | 0.153          | 0.562 (0.249-1.269) | 0.166          |
| SHR2 Q4 (> 1.03)              | 0.624 (0.293-1.332) | 0.223          | 0.628 (0.293-1.342) | 0.200          | 0.614 (0.270-1.394) | 0.224          | 0.657 (0.268-1.611) | 0.359          |
| SHR2 (> 0.92 versus ≤ 0.92)   | 0.664 (0.379-1.165) | 0.153          | 0.669 (0.380-1.177) | 0.163          | 0.609 (0.327-1.133) | 0.117          | 0.610 (0.313-1.187) | 0.146          |
| SHR2 (per 0.1-point increase) | 0.901 (0.787-1.032) | 0.131          | 0.902 (0.788-1.033) | 0.139          | 0.887 (0.766-1.026) | 0.107          | 0.881 (0.745-1.043) | 0.141          |

Abbreviations: SHR Stress hyperglycemia ratio, SHR1 was defined as [RBG (mmol/L)]/[HbA1c (%)] and SHR2 was defined as [FBG (mmol/L)]/[HbA1c(%)].

Model 1 adjusted for age and sex.

Model 2 adjusted for age, sex, current smoking, hyperlipidemia, atrial fibrillation, prior stroke, systolic blood pressure (SBP) and NIHSS at admission.

Model 3 adjusted for covariates from Model 2 and further adjusted for body mass index (BMI), diabetes and triglyceride-glucose index (TyG).

3 patients without 24h-NIHSS scores were excluded from the analysis.

Figure S1: Receiver operating characteristic (ROC) curves for admission random blood glucose (RBG), fasting blood glucose (FBG), and stress hyperglycemia ratio (SHR) with 3-month poor function outcomes as endpoint.

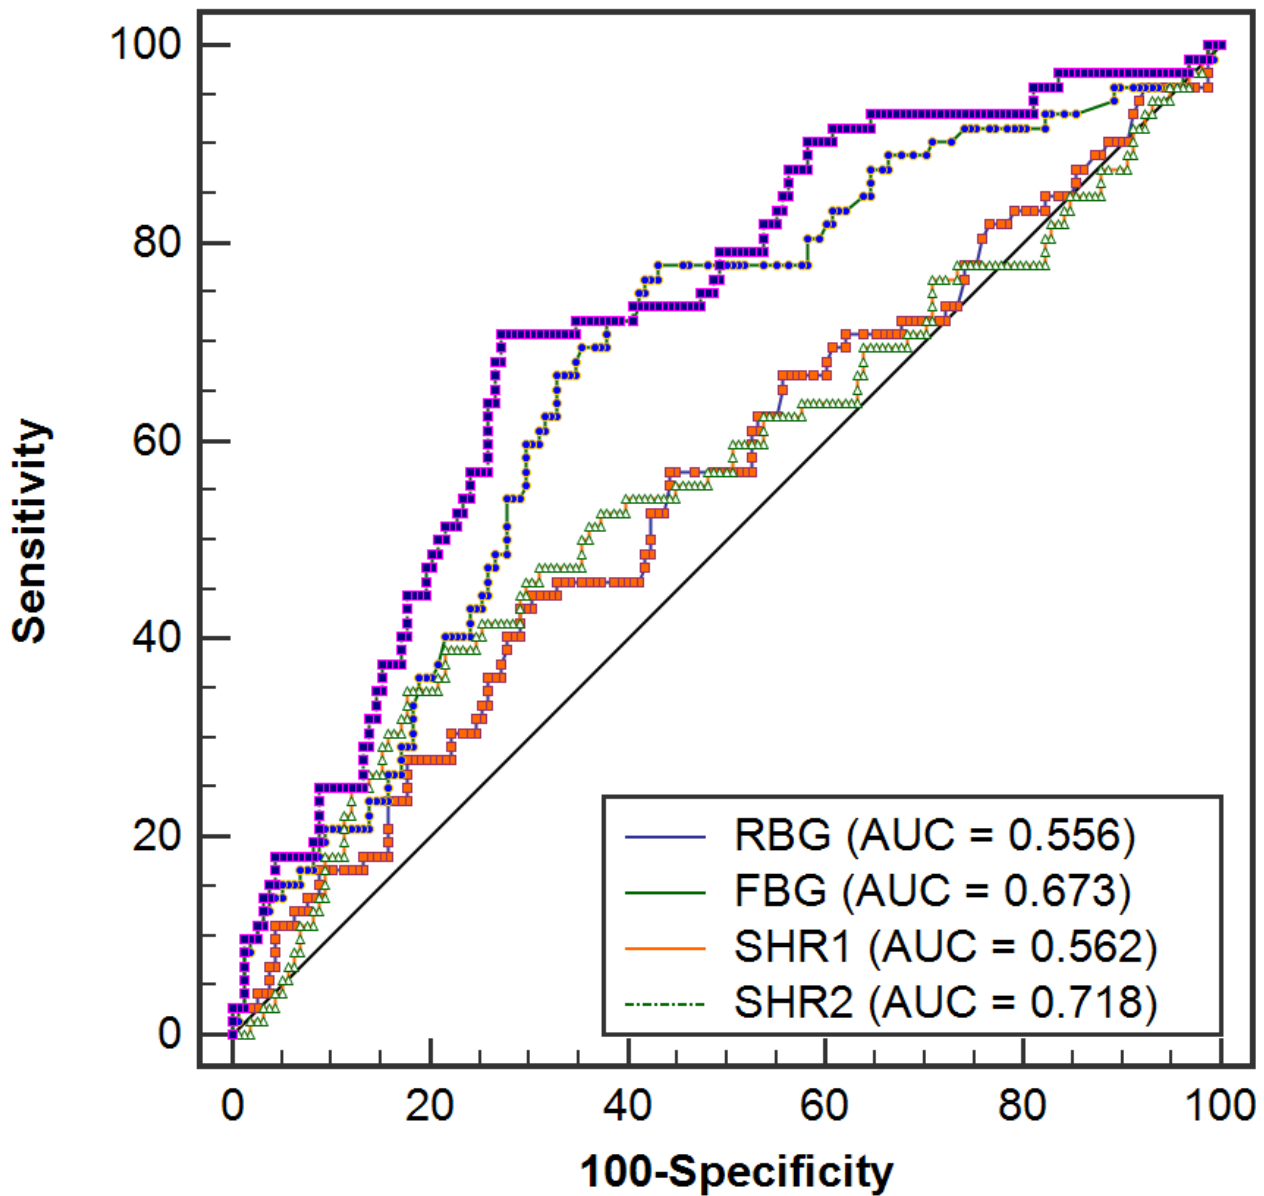

SHR1 was defined as  $[\text{RBG (mmol/L)}]/[\text{HbA1c (\%)}]$  and SHR2 was defined as  $[\text{FBG (mmol/L)}]/[\text{HbA1c (\%)}]$ .
